# Supplementary material for: Stable self-trapped broadband emission from an organolead halide coordination polymer with strong layer corrugation and high chemical robustness
Source: Royal Society of Chemistry journal article supplement (doi:10.1039/d3qi00283g), 2023-01-01
Supplement: d3qi00283g1.pdf [file d3qi00283g1.pdf]

## Supporting Information

### **Stable Self-Trapped Broadband Emission from an Organolead Halide Coordination Polymer with Strong Layer Corrugation and High Chemical Robustness**

*Ruonan Xi, Yilin Jiang, Yukong Li, Jinlin Yin, Honghan Fei\**

School of Chemical Science and Engineering, Shanghai Key Laboratory of Chemical  
Assessment and Sustainability, Tongji University, Shanghai 200092, P. R. China

Corresponding Author: [fei@tongji.edu.cn](mailto:fei@tongji.edu.cn)

**Table S1.** Crystallographic data and structure refinement for TJU-19.

|                                                                                                      |                                                                                             |
|------------------------------------------------------------------------------------------------------|---------------------------------------------------------------------------------------------|
| Identification code                                                                                  | TJU-19                                                                                      |
| Empirical formula                                                                                    | Pb <sub>2</sub> Cl <sub>2</sub> C <sub>5</sub> H <sub>2</sub> N <sub>2</sub> O <sub>4</sub> |
| Formula weight                                                                                       | 639.37                                                                                      |
| Temperature/K                                                                                        | 297.0                                                                                       |
| Crystal system                                                                                       | triclinic                                                                                   |
| Space group                                                                                          | <i>P</i> -1                                                                                 |
| <i>a</i> /Å                                                                                          | 7.0068(8)                                                                                   |
| <i>b</i> /Å                                                                                          | 12.0274(16)                                                                                 |
| <i>c</i> /Å                                                                                          | 12.3700(15)                                                                                 |
| $\alpha$ /°                                                                                          | 65.906(4)                                                                                   |
| $\beta$ /°                                                                                           | 89.857(4)                                                                                   |
| $\gamma$ /°                                                                                          | 87.582(4)                                                                                   |
| <i>V</i> /Å <sup>3</sup>                                                                             | 950.7(2)                                                                                    |
| <i>Z</i>                                                                                             | 4                                                                                           |
| $\rho_{\text{calc}}$ /cm <sup>3</sup>                                                                | 4.467                                                                                       |
| $\mu$ /mm <sup>-1</sup>                                                                              | 35.926                                                                                      |
| <i>F</i> (000)                                                                                       | 1104.0                                                                                      |
| Crystal size/mm <sup>3</sup>                                                                         | 0.12 × 0.11 × 0.11                                                                          |
| Radiation                                                                                            | MoK $\alpha$ ( $\lambda$ = 0.71073)                                                         |
| 2 $\theta$ range for data collection/°                                                               | 5.82 to 55.04                                                                               |
| Index ranges                                                                                         | -9 ≤ <i>h</i> ≤ 8, -15 ≤ <i>k</i> ≤ 15, -16 ≤ <i>l</i> ≤ 15                                 |
| Reflections collected                                                                                | 22509                                                                                       |
| Independent reflections                                                                              | 4369 [ <i>R</i> <sub>int</sub> = 0.0666, <i>R</i> <sub>sigma</sub> = 0.0511]                |
| Data/restraints/parameters                                                                           | 4369/0/271                                                                                  |
| Goodness-of-fit on <i>F</i> <sup>2</sup>                                                             | 1.119                                                                                       |
| Final <i>R</i> indexes [ <i>I</i> ≥ 2 $\sigma$ ( <i>I</i> )]                                         | <i>R</i> <sub>1</sub> = 0.0343, <i>wR</i> <sub>2</sub> = 0.0648                             |
| Final <i>R</i> indexes [all data]                                                                    | <i>R</i> <sub>1</sub> = 0.0531, <i>wR</i> <sub>2</sub> = 0.0707                             |
| Largest diff. peak/hole / e Å <sup>-3</sup>                                                          | 1.50/-2.03                                                                                  |
| $R_1 = \sum( F_o  -  F_c ) / \sum F_o $ ; $wR_2 = \{\sum[w(F_o^2 - F_c^2)] / \sum[w(F_o^2)]\}^{1/2}$ |                                                                                             |

**Table S2.** Photophysical properties of TJU-19

| Material | $\lambda_{\text{abs}}$ <sup>a</sup> | $\lambda_{\text{em}}$ <sup>b</sup> | ( <i>x</i> , <i>y</i> ) <sup>c</sup> | PLQY <sup>d</sup> |
|----------|-------------------------------------|------------------------------------|--------------------------------------|-------------------|
| TJU-19   | 347 nm                              | 520 nm                             | (0.23, 0.45)                         | 12.9%             |

<sup>a</sup>  $\lambda_{\text{abs}}$  is the absorption edge; <sup>b</sup>  $\lambda_{\text{em}}$  is the maximum emission wavelength; <sup>c</sup> (*x*, *y*) is the chromatic coordinates; <sup>d</sup> PLQY is photoluminescence quantum yield.

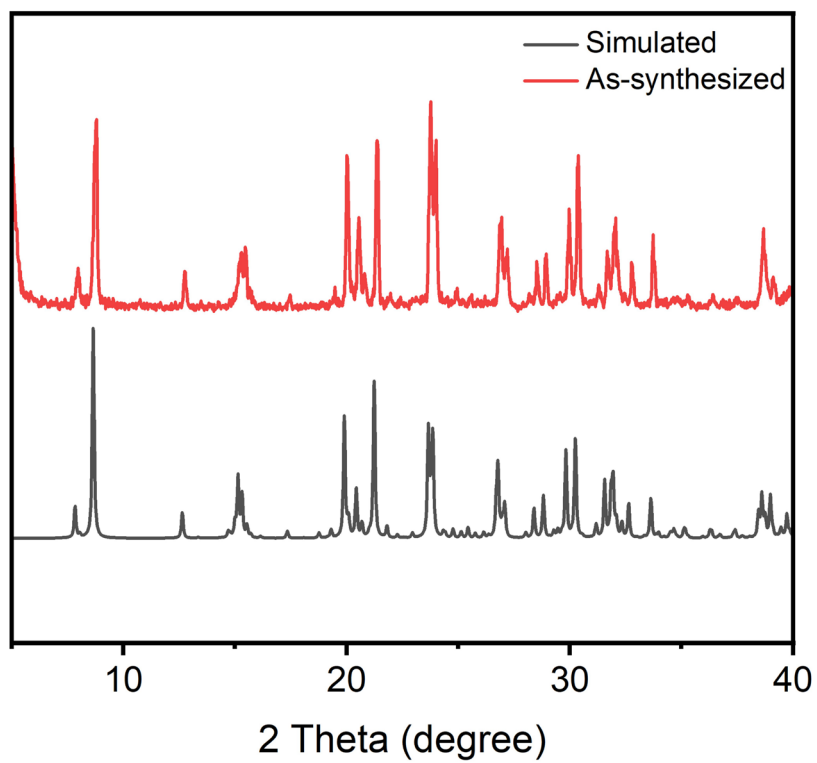

**Figure S1.** Simulated and experimental PXRD of TJU-19.

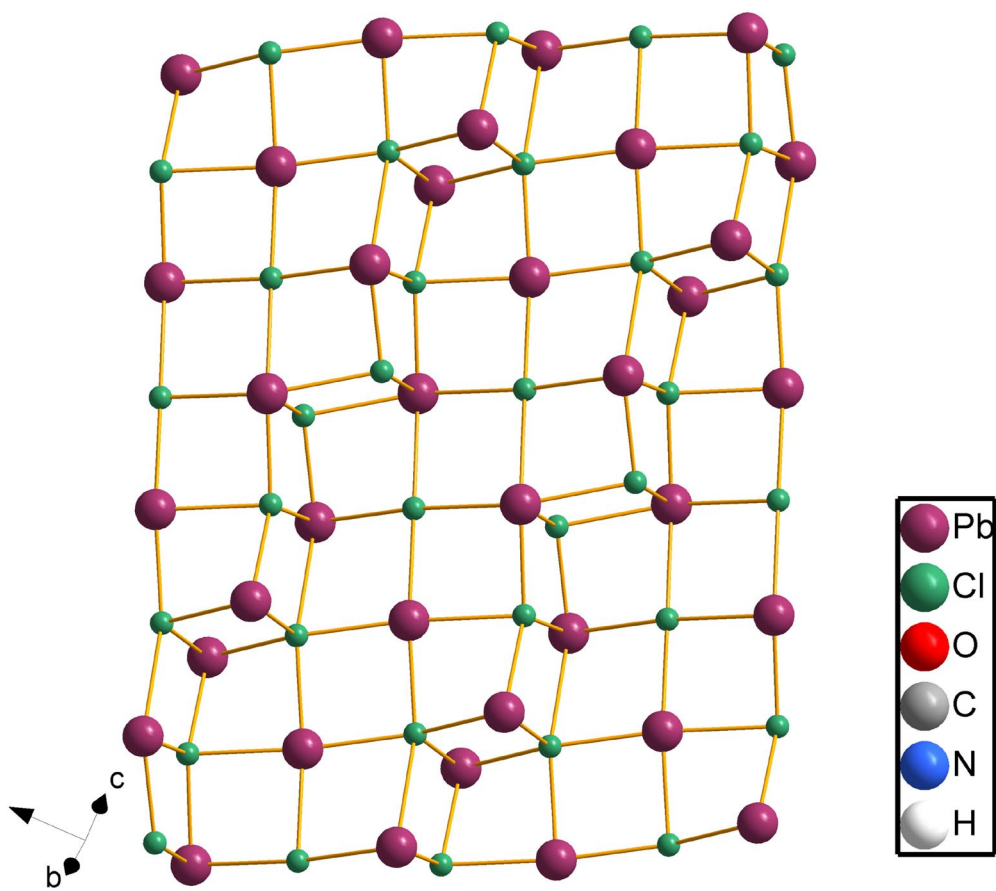

**Figure S2.** Crystallographic top-view of a single  $[\text{Pb}_2\text{Cl}_2]^{2+}$  layer.

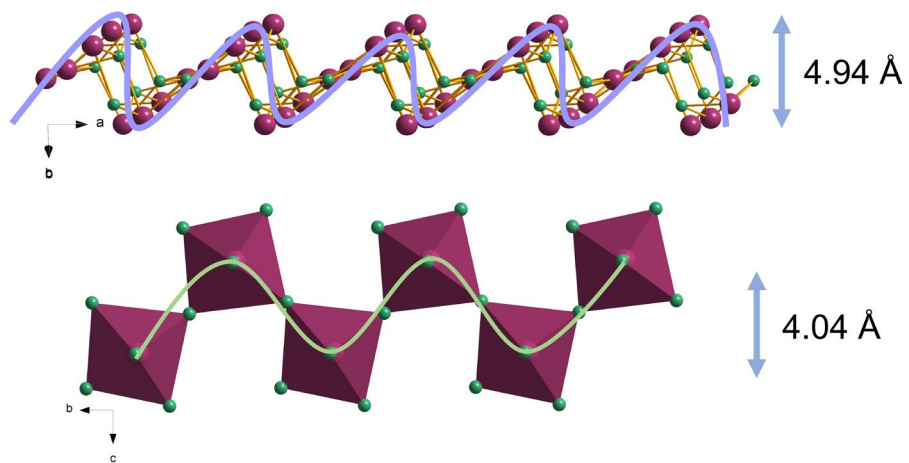

**Figure S3.** Layer corrugation of a single  $[\text{Pb}_2\text{Cl}_2]^{2+}$  layer of TJU-19 and a single layer of (110)-oriented perovskite 1.

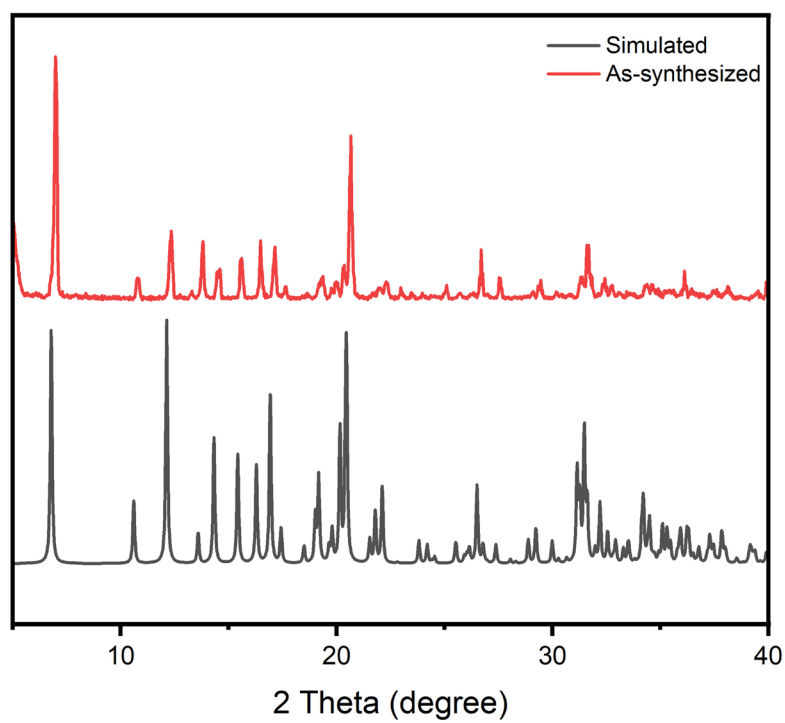

**Figure S4.** Simulated and experimental PXRD of perovskite **1**.

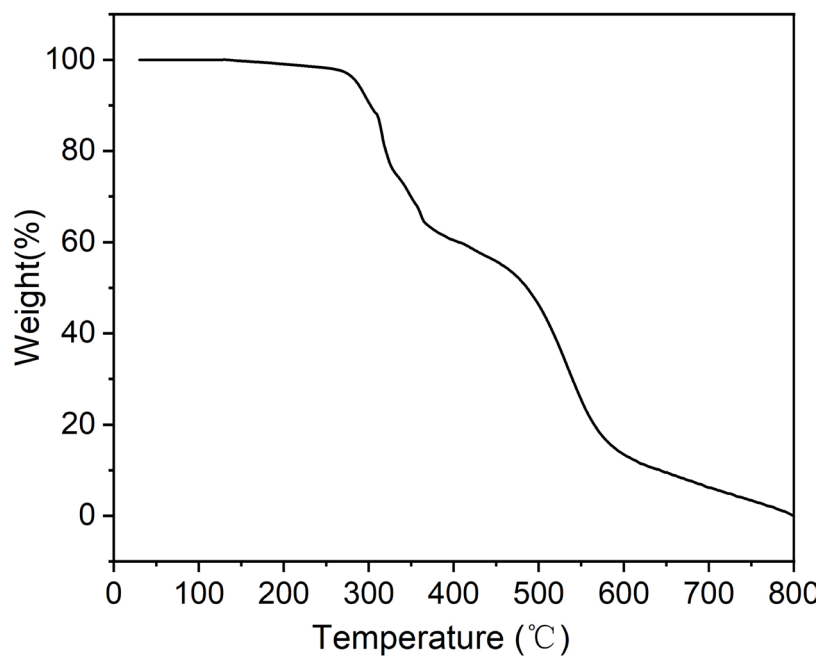

**Figure S5.** Thermogravimetric analysis of TJU-19 in N<sub>2</sub> flow.

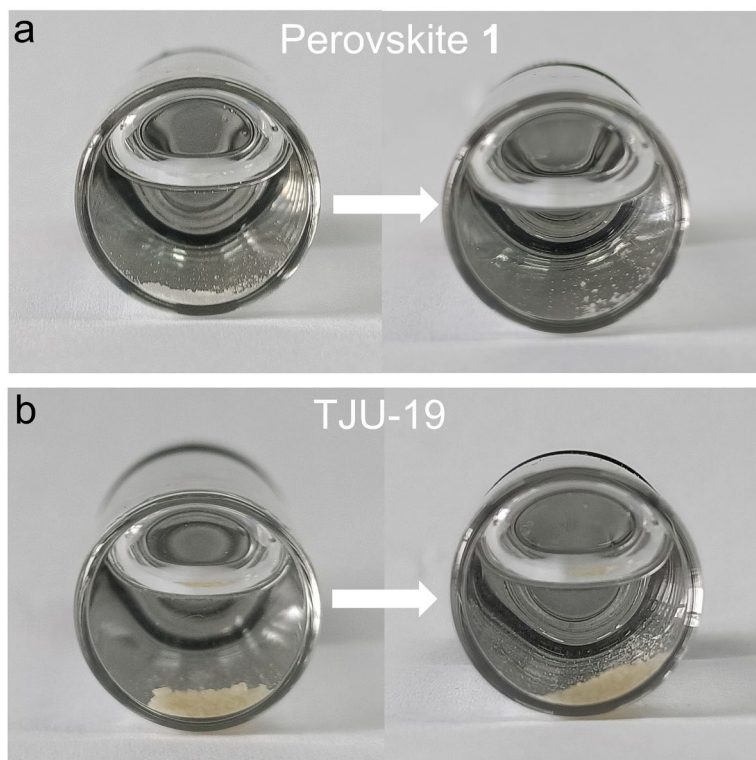

**Figure S6.** Photographs of perovskite **1** and TJU-19 in pure water before and after 24

h.



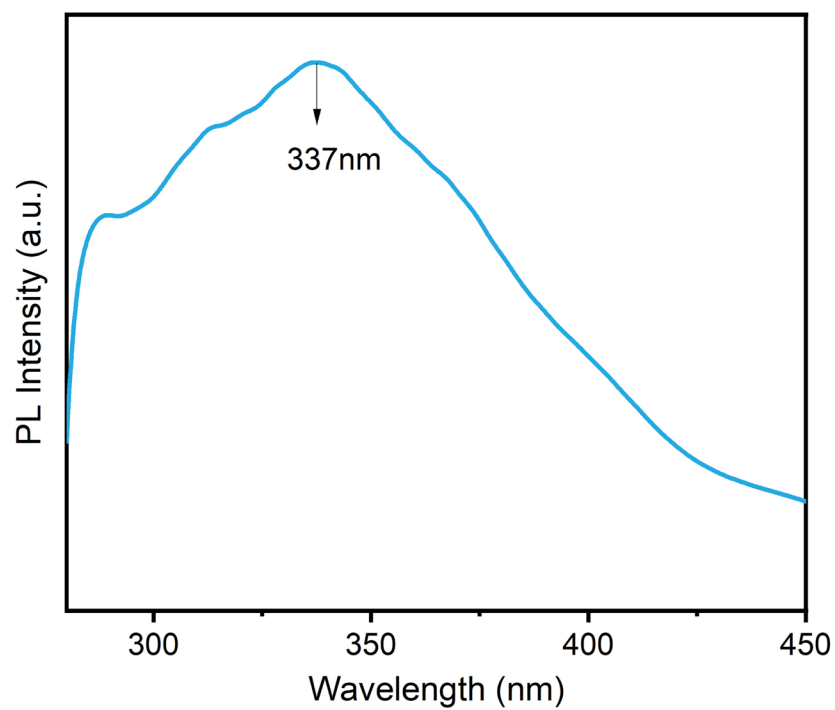

**Figure S7.** Excitation spectra of TJU-19 at room temperature.

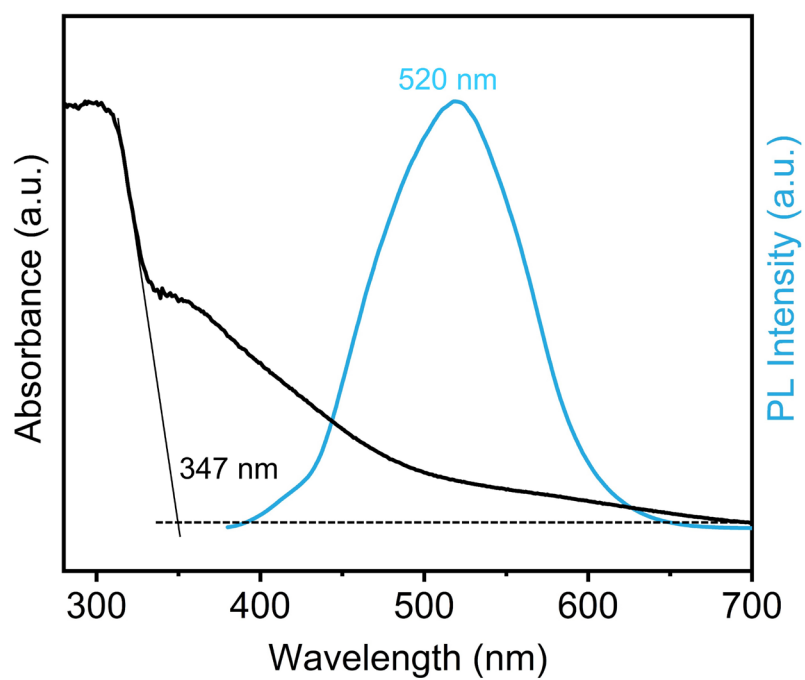

**Figure S8.** UV-vis diffuse reflectance spectroscopy and photoluminescence spectra of TJU-19 measured at room temperature.

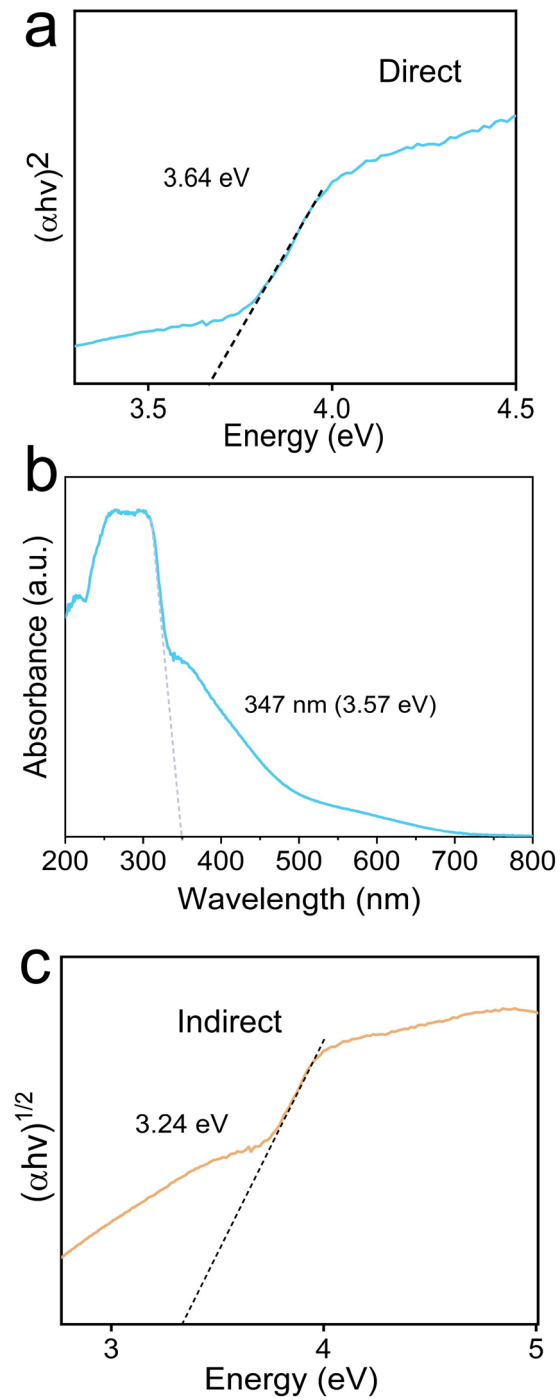

**Figure S9.** (a) Tauc plot of TJU-19 fitted by direct bandgap. (b) UV-vis diffuse reflectance spectroscopy of TJU-19. (c) Tauc plot of TJU-19 fitted by indirect bandgap.

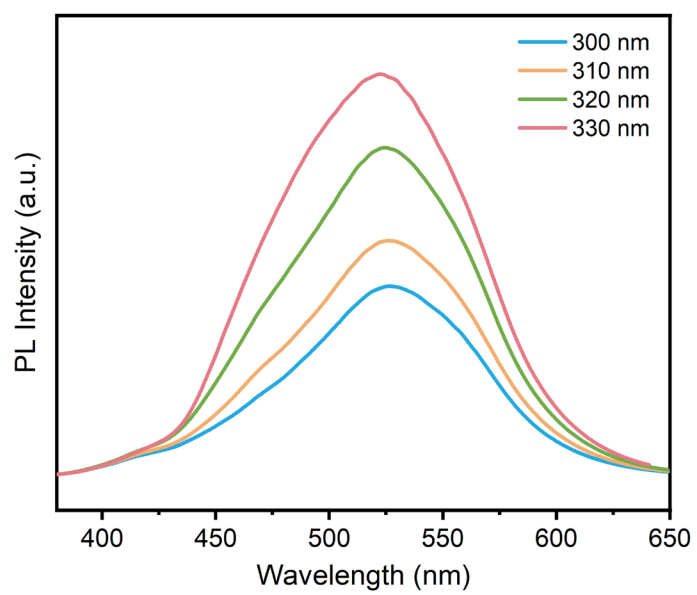

**Figure S10.** Excitation-dependent emission spectra of TJU-19 from 300 to 330 nm.

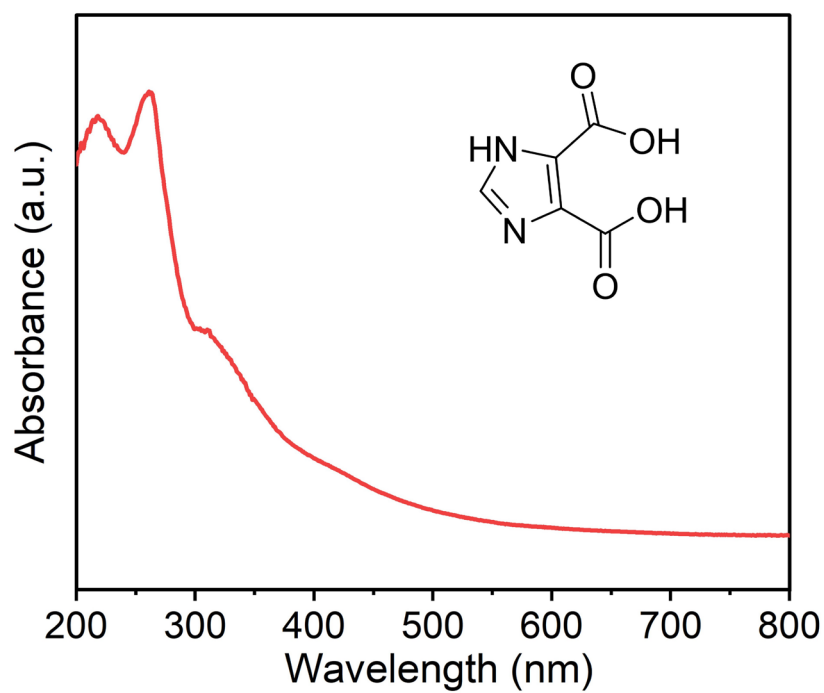

**Figure S11.** UV-vis absorption spectra of the free imdc<sup>2-</sup> ligands.

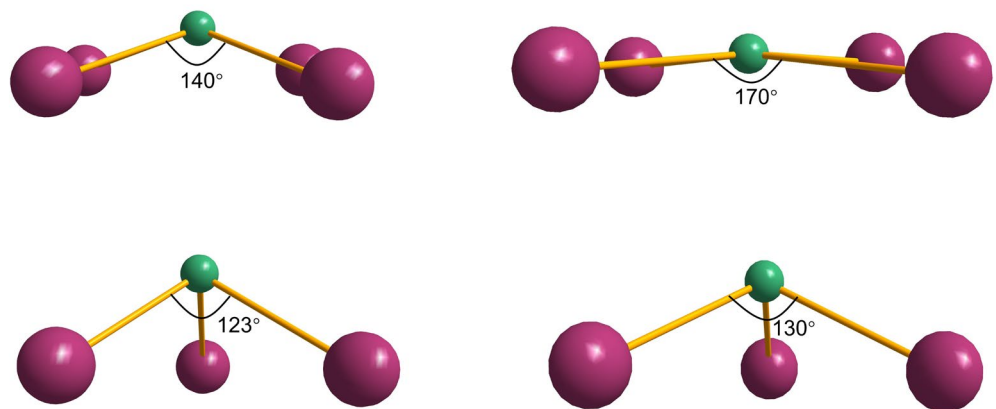

**Figure S12.** The coordination environment of the  $\mu_3/\mu_4$ -bridging chloride species in TJU-19.

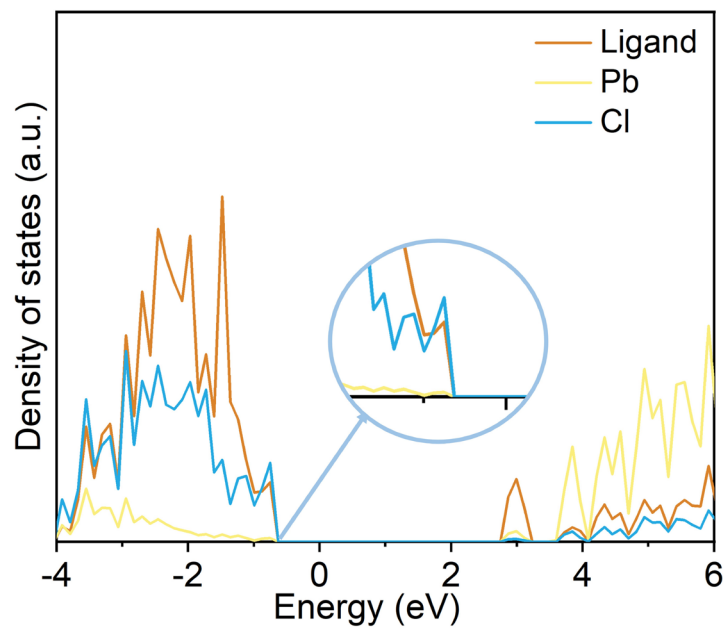

**Figure S13.** Calculated DOS for the ligand (orange), Cl (blue) and Pb (yellow) in TJU-19.

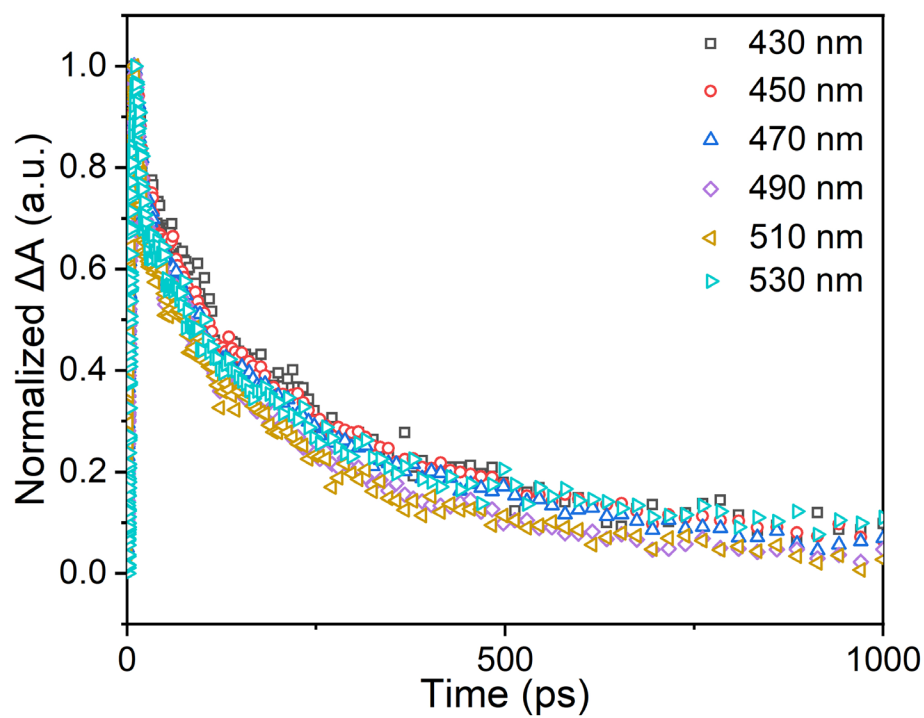

**Figure S14.** TA kinetics of TJU-19 ranging from 400 to 550 nm.



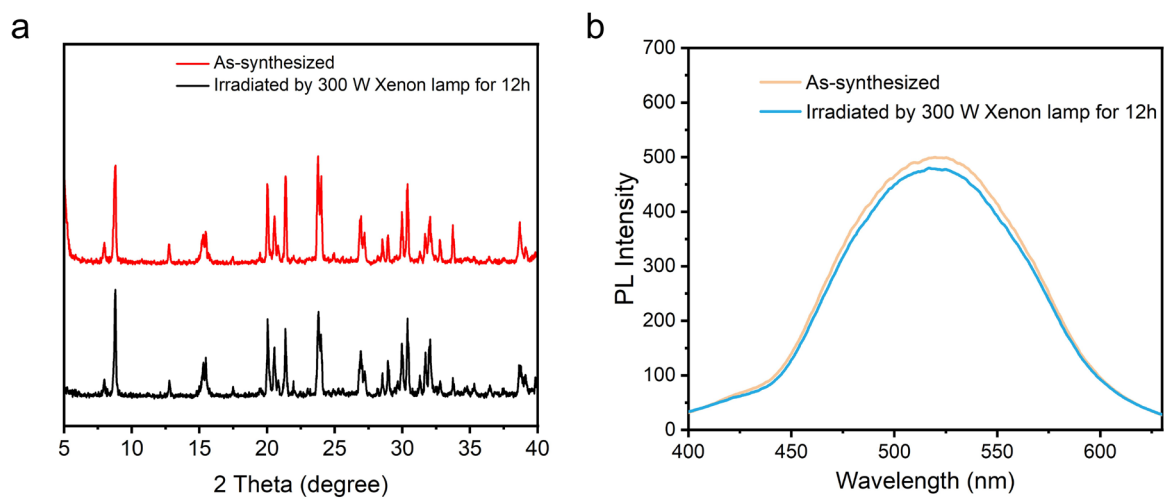

**Figure S15.** PXRD and emission spectra of TJU-19 before and after continuous illumination in air from a 300 W Xe lamp for 12 h.
